# Supplementary material for: Recovery of Flexible Polyurethane Foam Waste for Efficient Reuse in Industrial Formulations
Source: PubMed Central journal article supplement (PMC7407941; doi:10.3390/polym12071533), 2020-07-10
Supplement: polymers-12-01533-s001.pdf [file polymers-12-01533-s001.pdf]

## Supplementary material

# Recovery of flexible polyurethane foam waste for efficient reuse in industrial formulations

Gabriel Kiss <sup>1,2</sup>, Gerlinde Rusu <sup>1\*</sup>, Francisc Péter <sup>1</sup>, Ionuț Tănase <sup>1</sup> and Geza Bandur <sup>1</sup>

<sup>1</sup> University Politehnica Timișoara, Faculty of Industrial Chemistry and Environmental Engineering, C. Telbisz 6, 300001 Timișoara, Romania

<sup>2</sup> Momentive Performances Materials, Carl-Duisberg-Strasse 101, 51373 Leverkusen

\* Correspondence: Gerlinde.rusu@upt.ro; Tel.: +40-256-404221

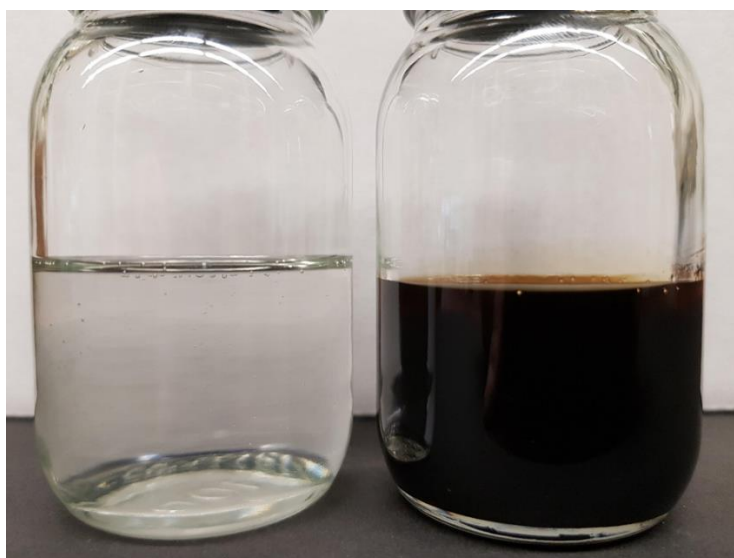

**Figure 1S.** Glycolysis product obtained from flexible PU foam waste and diethylene glycol at 1:1 (w/w) ratio, in autoclave (image at right), compared to the virgin polyol (image at left)

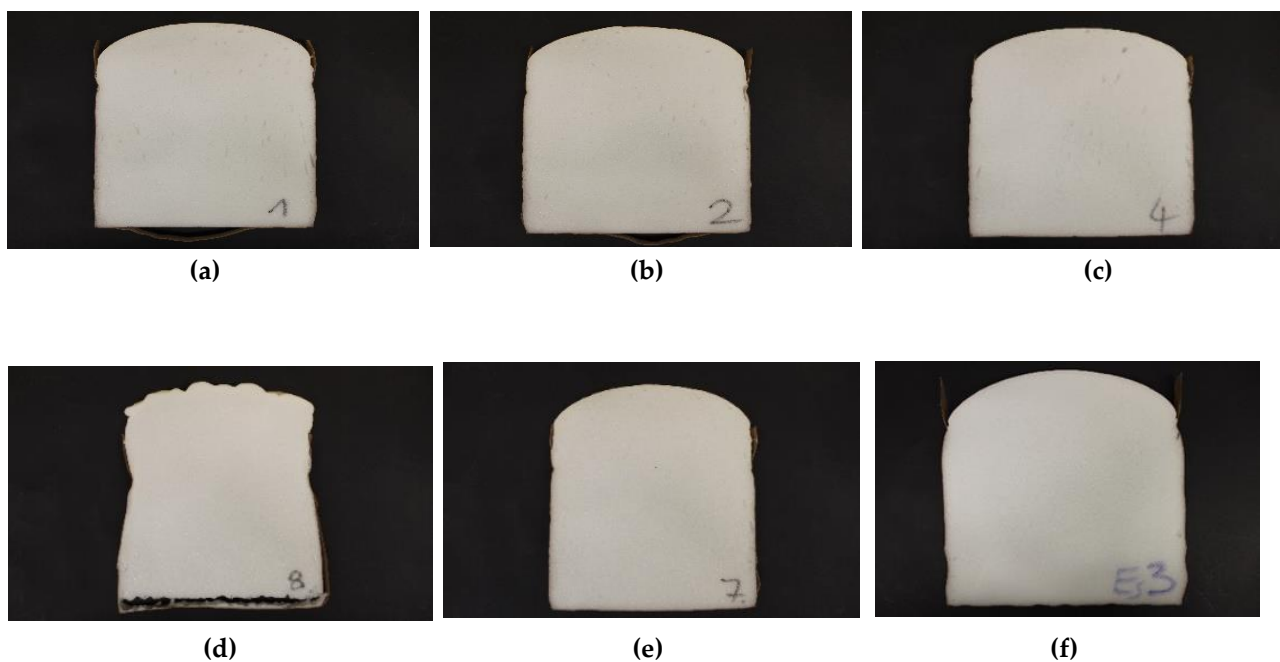

**Figure 2S.** Images of the reference polyether-based polyurethane foam (a); polyether-based polyurethane foams obtained with 1% recycled polyol from 25% PU waste EXP 2 (b), respectively from 50% PU waste EXP 5 (c); polyether-based polyurethane foams obtained with 5% recycled polyol from 25% PU waste EXP 2 (d), respectively from 50% PU waste EXP 5 (e); polyether-based polyurethane foams obtained with 5% recycled polyol from 50% PU waste and optimized formulation EXP 6 (f)
